# Supplementary material
Source: Springer Nature journal article supplement (https://www.springermedizin.de/resource/supplementary/12936_2013_2883_MOESM5_ESM.pdf/9544476)

**Additional file 5 Changes in relative risks of malaria prevalence with different intervention methods in 2010 (A) and 2011 (B). Parasite prevalence in population without ITN and IRS/Bti was used as control (RR = 1.0).**

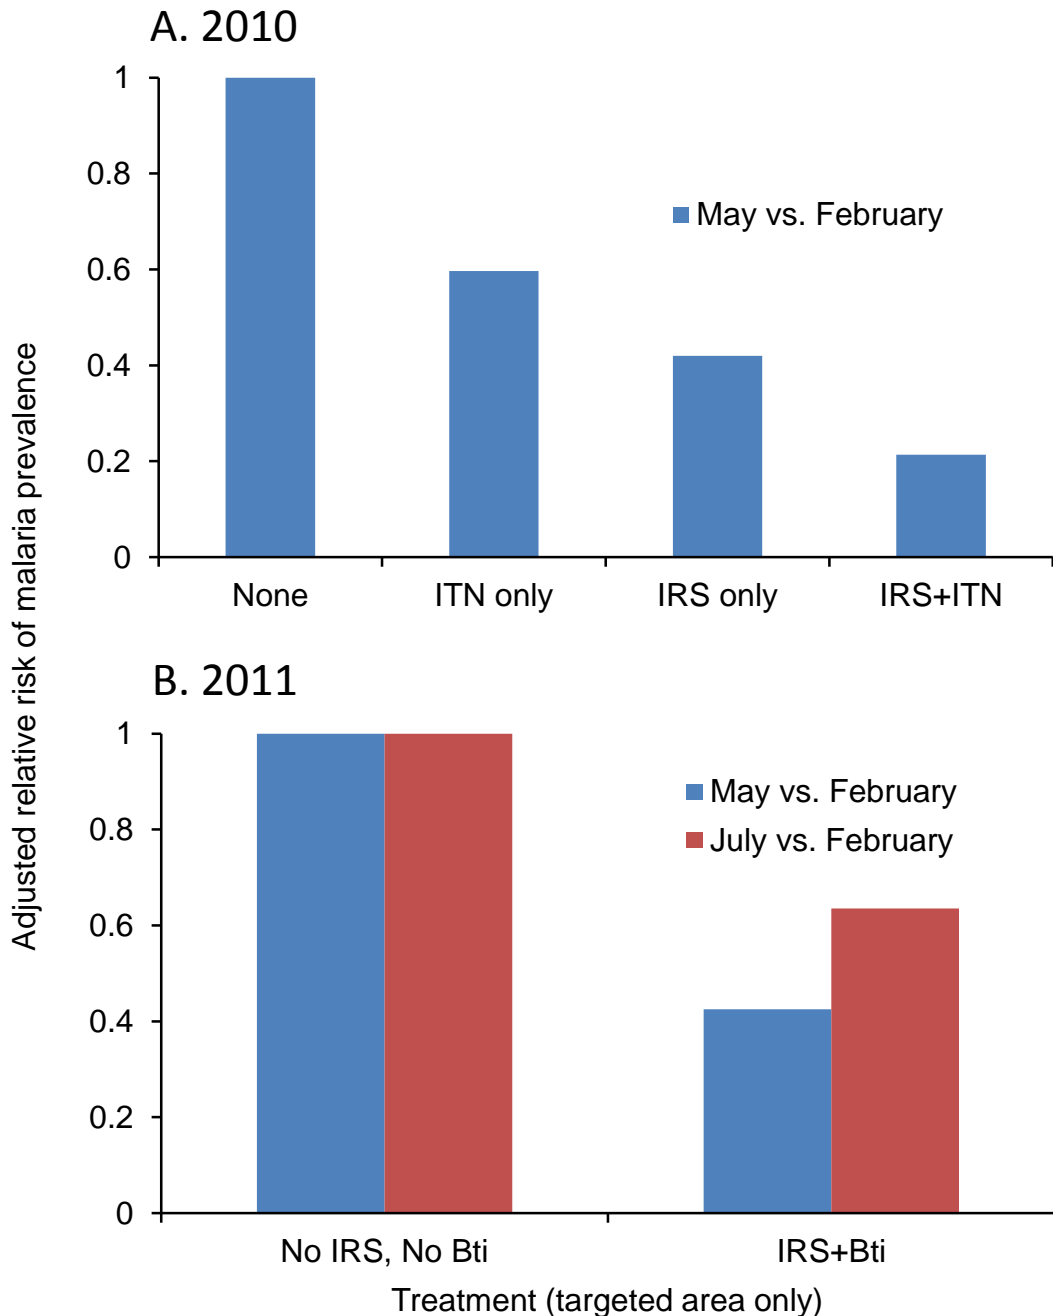

Supplement: MOESM5 [file 9544476]
